# Supplementary material for: Improved Dermal Delivery of Cyclosporine A Loaded in Solid Lipid Nanoparticles
Source: MDPI journal article supplement (doi:10.3390/nano9091204), 2019-08-27
Supplement: s1 [file s1]

# Improved Dermal Delivery of Cyclosporine A Loaded in Solid Lipid Nanoparticles

## Optimization of the lipid nanoparticles loaded with CsA

**Table S1.** Physicochemical characterization for the optimization of lipid nanoparticles for delivery of CsA.

| Type of lipid nanoparticle | Type of Surfactant | Size (nm) | PDI           | EE (%) | LC (%)    |
|----------------------------|--------------------|-----------|---------------|--------|-----------|
| SLNs                       | Pluronic F-127     | 178 ± 3   | 0.187 ± 0.014 | 85 ± 6 | 5.7 ± 0.5 |
| NLCs                       |                    | 207 ± 1   | 0.158 ± 0.026 |        |           |
| SLNs-CsA 5 mg              |                    | 218 ± 2   | 0.198 ± 0.008 |        |           |
| NLCs-CsA 5 mg              |                    | 202 ± 2   | 0.137 ± 0.007 | 77 ± 2 | 5.2 ± 0.2 |
| SLNs-CsA 10 mg             |                    | 255 ± 14  | 0.272 ± 0.018 | 75 ± 3 | 5.1 ± 0.3 |
| NLCs-CsA 10 mg             |                    | 275 ± 11  | 0.264 ± 0.022 | 76 ± 2 | 5.0 ± 0.2 |
| SLNs                       | Tween 80           | 228 ± 4   | 0.178 ± 0.008 | 76 ± 3 | 5.1 ± 0.2 |
| NLCs                       |                    | 238 ± 5   | 0.140 ± 0.006 |        |           |
| SLNs-CsA                   |                    | 225 ± 4   | 0.124 ± 0.011 |        |           |
| NLCs-CsA                   |                    | 240 ± 3   | 0.095 ± 0.005 | 68 ± 4 | 4.7 ± 0.3 |

Data expressed as mean ± standard deviation (n=3).

Chemical interactions between the CsA and the mixture of the lipid nanoparticles constituents evaluated by Fourier-transform infra-red spectroscopy

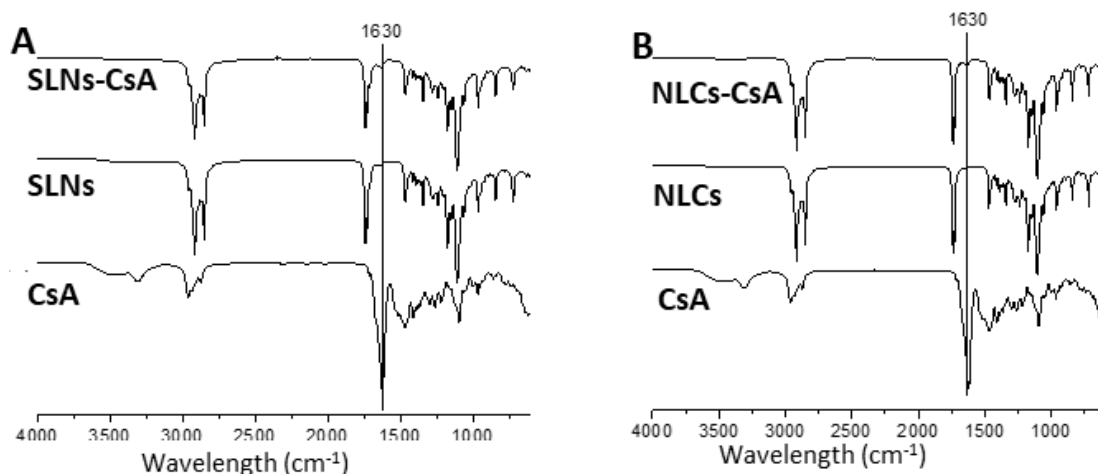

**Figure S1.** FTIR spectra of CsA alone and loaded in lipid nanoparticles. Analysis of (A) SLNs and (B) NLCs formulations in the wavelength ranges of 500-4000 cm<sup>-1</sup>.

#### ***In vitro* CsA release studies - application of the mathematical models**

CsA transport mechanisms were characterized by applying the mathematical models of first-order, Higuchi, Korsmeyer-Peppas, and Hixson-Crowell:

$$Q_t = Q_0 + K_f t$$

$$Q_t = Q_0 + K_H t^{0.5}$$

$$Q_t = Q_0 + K_{KP} t^n$$

$$Q_0^{1/3} - Q_t^{1/3} = \kappa t$$

where  $Q_t$  is the percentual amount of CsA released in time  $t$ ,  $Q_0$  is the amount of CsA in the release medium in the time 0,  $K_f$  is the first-order release constant,  $K_H$  is Higuchi dissolution constant,  $K_{KP}$  is the Korsmeyer-Peppas release constant and  $n$  its release exponent. For the Hixson and Crowell model,  $Q_t$  is the remaining amount of drug in the pharmaceutical form at time  $t$  and  $\kappa$  (kappa) is a constant incorporating the surface/ volume relation.

#### **Influence of lipid nanoparticles on cell viability**

Biocompatibility of SLNs and conjugated SLNs were tested in the presence of human keratinocytes (HaCaT cell line) and L929 fibroblasts, as recommended for the safety assessment (ISO 10993-5, 2009). The cell viability of the unloaded and CsA-loaded SLNs and NLCs was evaluated for 24 h, using the tetrazolium reduction technique.

Treatment with unloaded SLNs up to 2.0 mg mL<sup>-1</sup> (equivalent to 140 µg mL<sup>-1</sup> of CsA) did not affect the cell viability, exhibiting over 80% viability for the studied conditions (**Figure S2A**). The incorporation of CsA on the SLNs did not affect fibroblasts viability, while free drug exhibited an IC<sub>50</sub> value of 95.7 ± 2.2 µg mL<sup>-1</sup> (**Figure S2C**). CsA-loaded NLCs affects significantly the fibroblasts viability for concentrations above 70 µg mL<sup>-1</sup> CsA (equivalent to 1 mg mL<sup>-1</sup> in lipid). Cells viability was also reduced in the presence of unloaded NLCs at 2 mg mL<sup>-1</sup> (equivalent to 140 µg mL<sup>-1</sup> in CsA).

The topical assessment of cell viability was performed using human keratinocytes. Analysis of **Figure S2B** demonstrates that HaCaT keratinocytes viability was significantly affected by free CsA, exhibiting an IC<sub>50</sub> value of 26 ± 4 µg mL<sup>-1</sup>. The presence of CsA on the SLNs did not affect cell viability up to 140 µg mL<sup>-1</sup> of drug. NLCs and CsA-loaded NLCs decreased cells viability

below 70% in relation to non-treated cells, for concentrations above 17.5  $\mu\text{g mL}^{-1}$  CsA (equivalent to 0.25  $\text{mg mL}^{-1}$  in lipid).

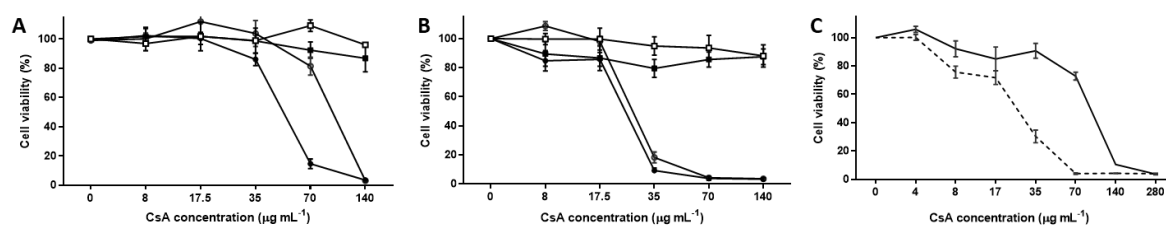

**Figure S2.** Cell viability evaluation. L929 (A) and HaCaT (B) cell viability exposed to SLNs (□), SLNs-CsA (■), NLCs (○) and NLCs-CsA (●). On C, free CsA effect on L929 (continuous line) and HaCaT (dotted line) up to 280  $\mu\text{g mL}^{-1}$ . Data expressed as mean  $\pm$  standard deviation ( $n = 4$ ).
